# Supplementary material
Source: publisher site journal article supplement (https://www.dovepress.com/article/473823)
Supplement: Supplementary file 1 [file get_supplementary_file.php]

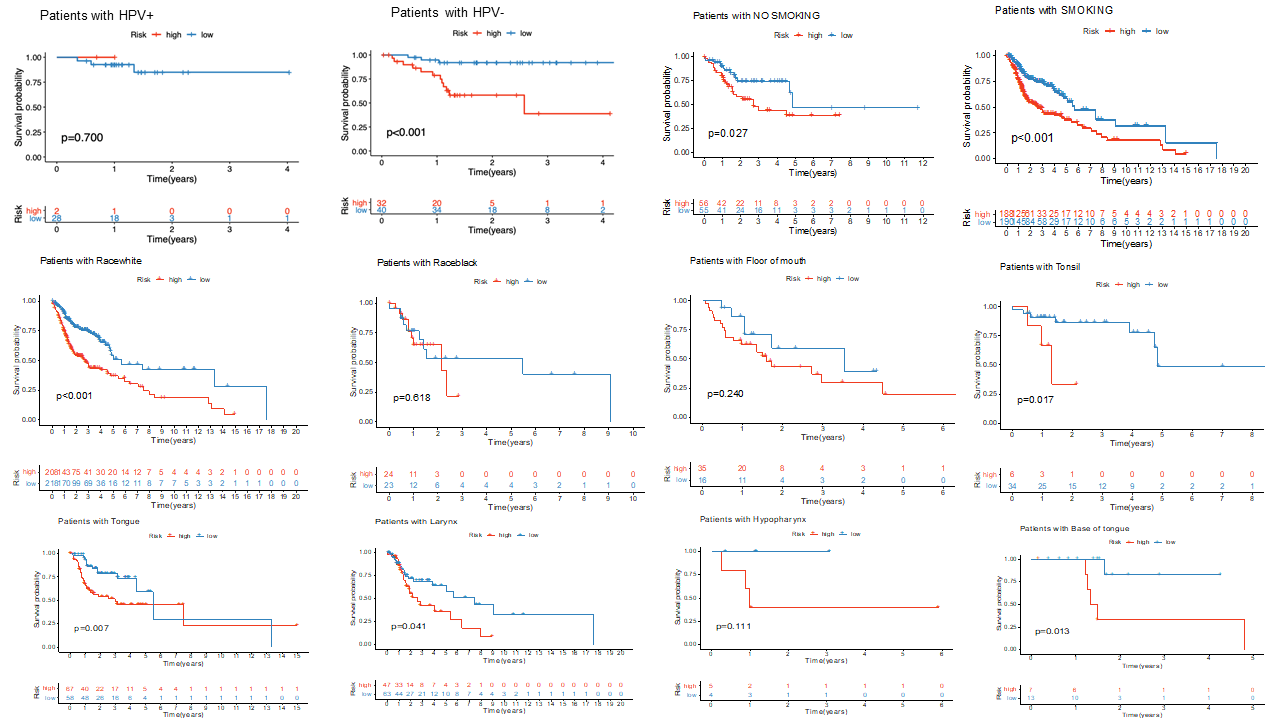


Figure S1 **K-M analysis of overall survival in different subgroups**


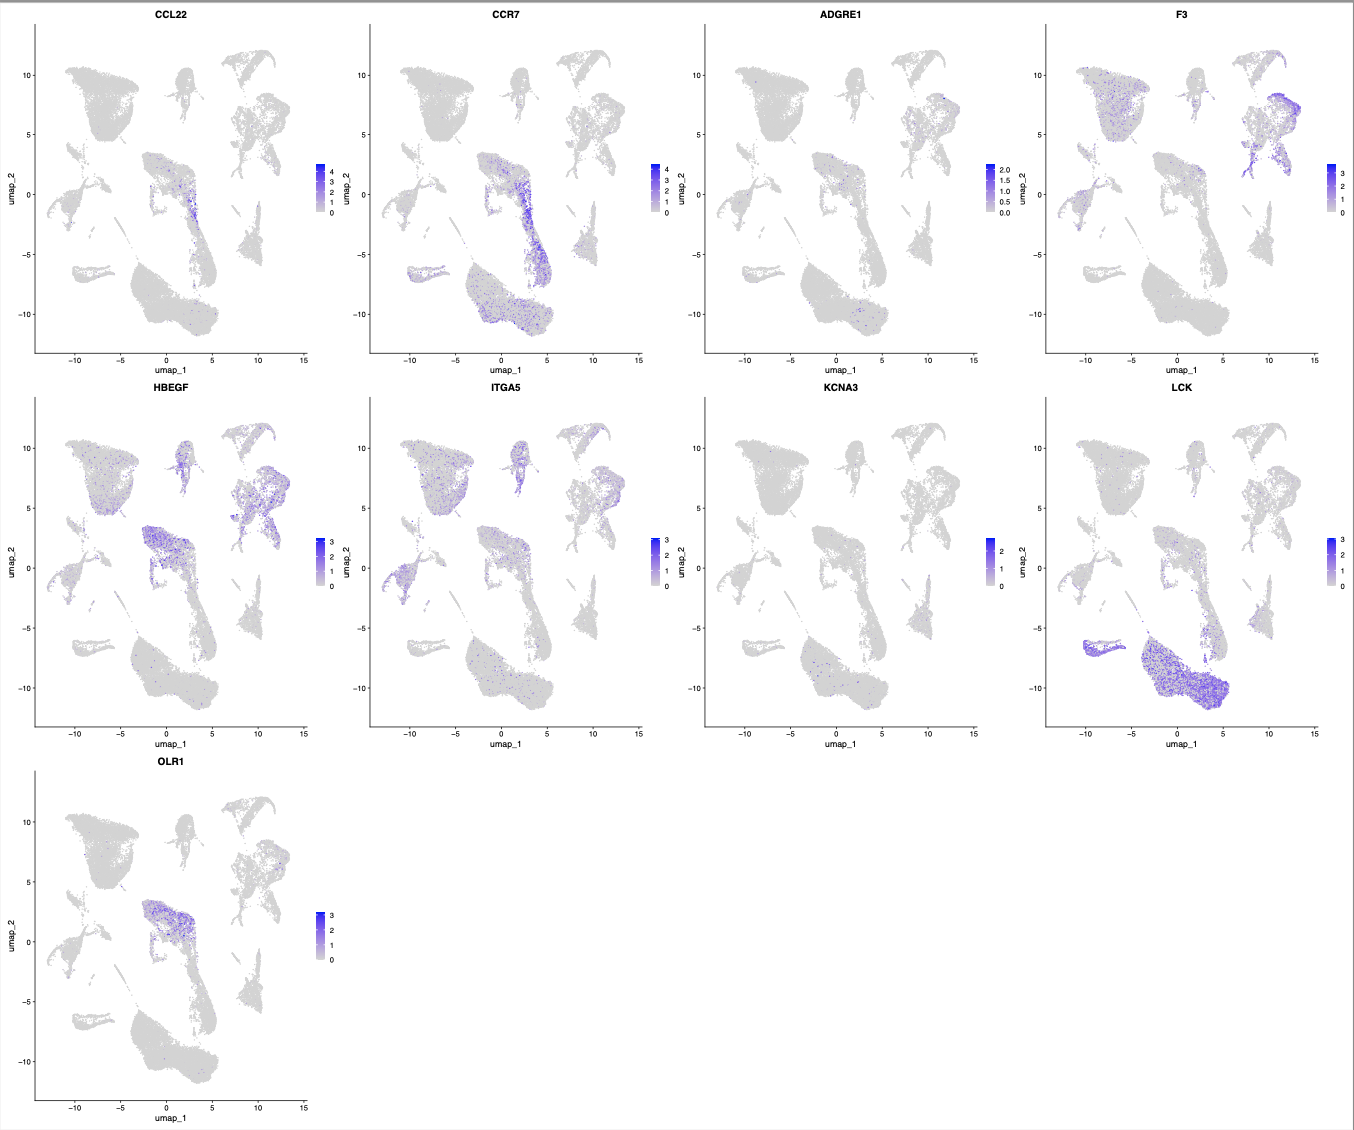


Figure S2 **UMAP plot showing the expression of the marker genes of the nine cell types.**


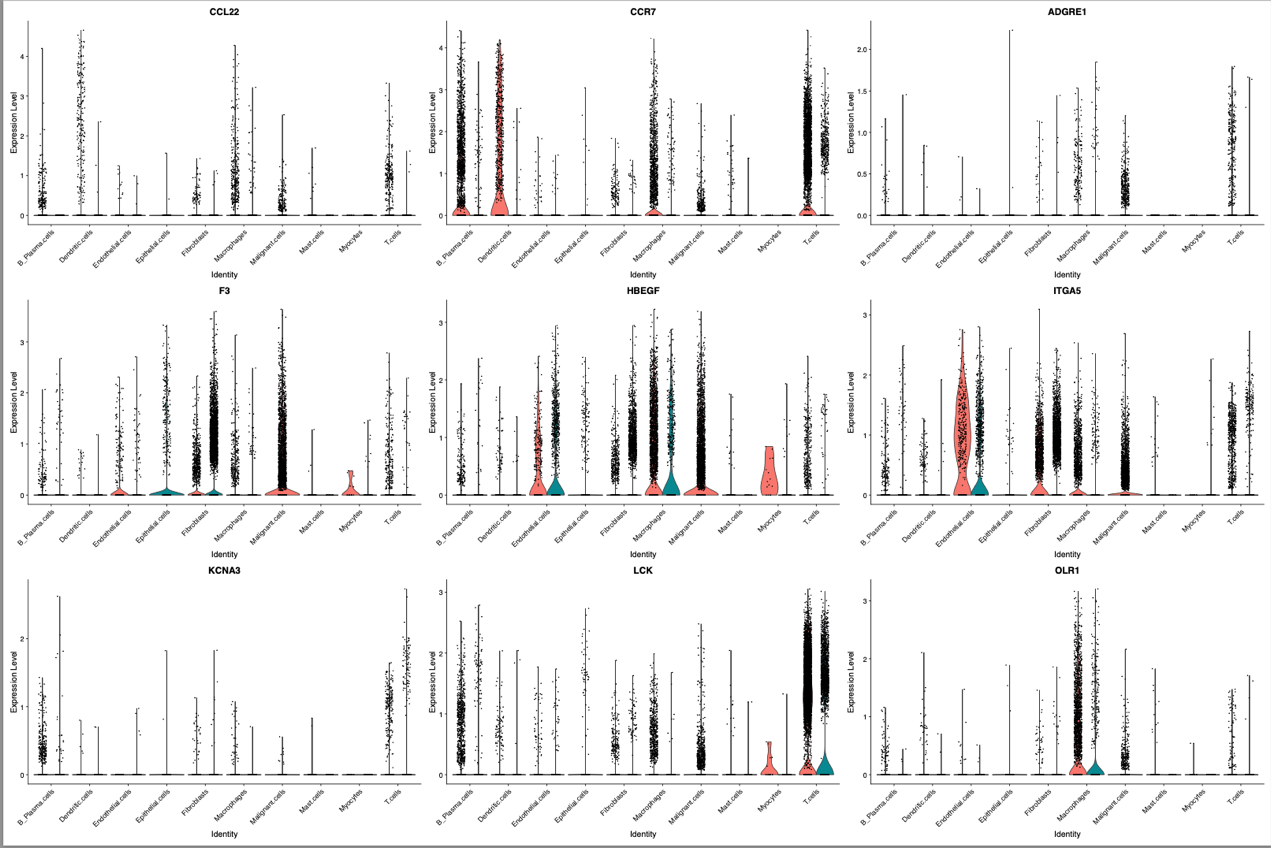


Figure S3 **Violin plot showing the expression of the marker genes of the nine cell types.**

Table S1. Clinical Patient Information

| Patient | Normal | Tumor | Histological type | Gender | Age | T | N | M |
| --- | --- | --- | --- | --- | --- | --- | --- | --- |
| P1 | P1-NL | P1-CA | Oral cancer | F | 34 | T3 | N1 | M0 |
| P2 | P2-NL | P2-CA | Oral cancer | M | 48 | T2 | N2 | M0 |
| P3 | P3-NL | P3-CA | Oral cancer | F | 44 | T4 | N1 | M0 |
| P4 | P4-NL | P4-CA | Oral cancer | M | 52 | T3 | N2 | M0 |
| P5 | P5-NL | P5-CA | Oral cancer | M | 39 | T3 | N2 | M0 |
